# Supplementary material for: Anti-Diabetic Effect of Organo-Chalcogen (Sulfur and Selenium) Zinc Complexes with Hydroxy-Pyrone Derivatives on Leptin-Deficient Type 2 Diabetes Model ob/ob Mice
Source: PubMed Central journal article supplement (PMC5751249; doi:10.3390/ijms18122647), 2017-12-07
Supplement: ijms-18-02647-s001.pdf [file ijms-18-02647-s001.pdf]

**Table S1.**  $^{13}\text{C}$ -NMR chemical shift ( $\Delta\delta$ ) data for organo-sulfur (S) and selenium (Se) ligands and the corresponding Zn complexes in  $\text{CDCl}_3$ .

| Compound                          | Chemical shifts (ppm) |        |        |        |        |
|-----------------------------------|-----------------------|--------|--------|--------|--------|
|                                   | C1                    | C2     | C3     | C4     | C5     |
| hmpt                              | 145.27                | 150.61 | 185.88 | 124.20 | 146.97 |
| $[\text{Zn}(\text{hmpt})_2]$      | 154.23                | 159.99 | 176.83 | 122.54 | 144.60 |
| $\Delta\delta$                    | +8.96                 | +9.38  | -9.05  | -1.66  | -2.37  |
| hmpt [17]                         | 145.03                | 154.21 | 185.83 | 129.55 | 145.49 |
| $[\text{Zn}(\text{hmpt})_2]$ [17] | 154.40                | 162.38 | 175.17 | 126.19 | 143.27 |
| $\Delta\delta$ [17]               | +9.39                 | +8.17  | -10.66 | -3.36  | -2.22  |

**Table S2.** Triglyceride and glycogen contents in the liver of ob/ob mice treated with Zn complexes.

|                       | Normal  | Control     | $[\text{Zn}(\text{hmpt})_2]$ | $[\text{Zn}(\text{hmpt})_2]$ |
|-----------------------|---------|-------------|------------------------------|------------------------------|
| TG (mg/g liver)       | 16 ± 11 | 437 ± 139   | 309 ± 134                    | 443 ± 42                     |
| Glycogen (mg/g liver) | -       | 0.08 ± 0.04 | 0.03 ± 0.01                  | 0.04 ± 0.01                  |

Data are expressed as mean ± SDs for 6–8 mice. The detailed methods for measuring both TG and glycogen contents in the liver are described in Materials and Methods section (4.10).
